# Supplementary material for: Accuracy of prostate cancer screening recommendations for high‐risk populations on YouTube and TikTok
Source: PubMed Central journal article supplement (PMC9931542; doi:10.1002/bco2.200), 2022-11-08

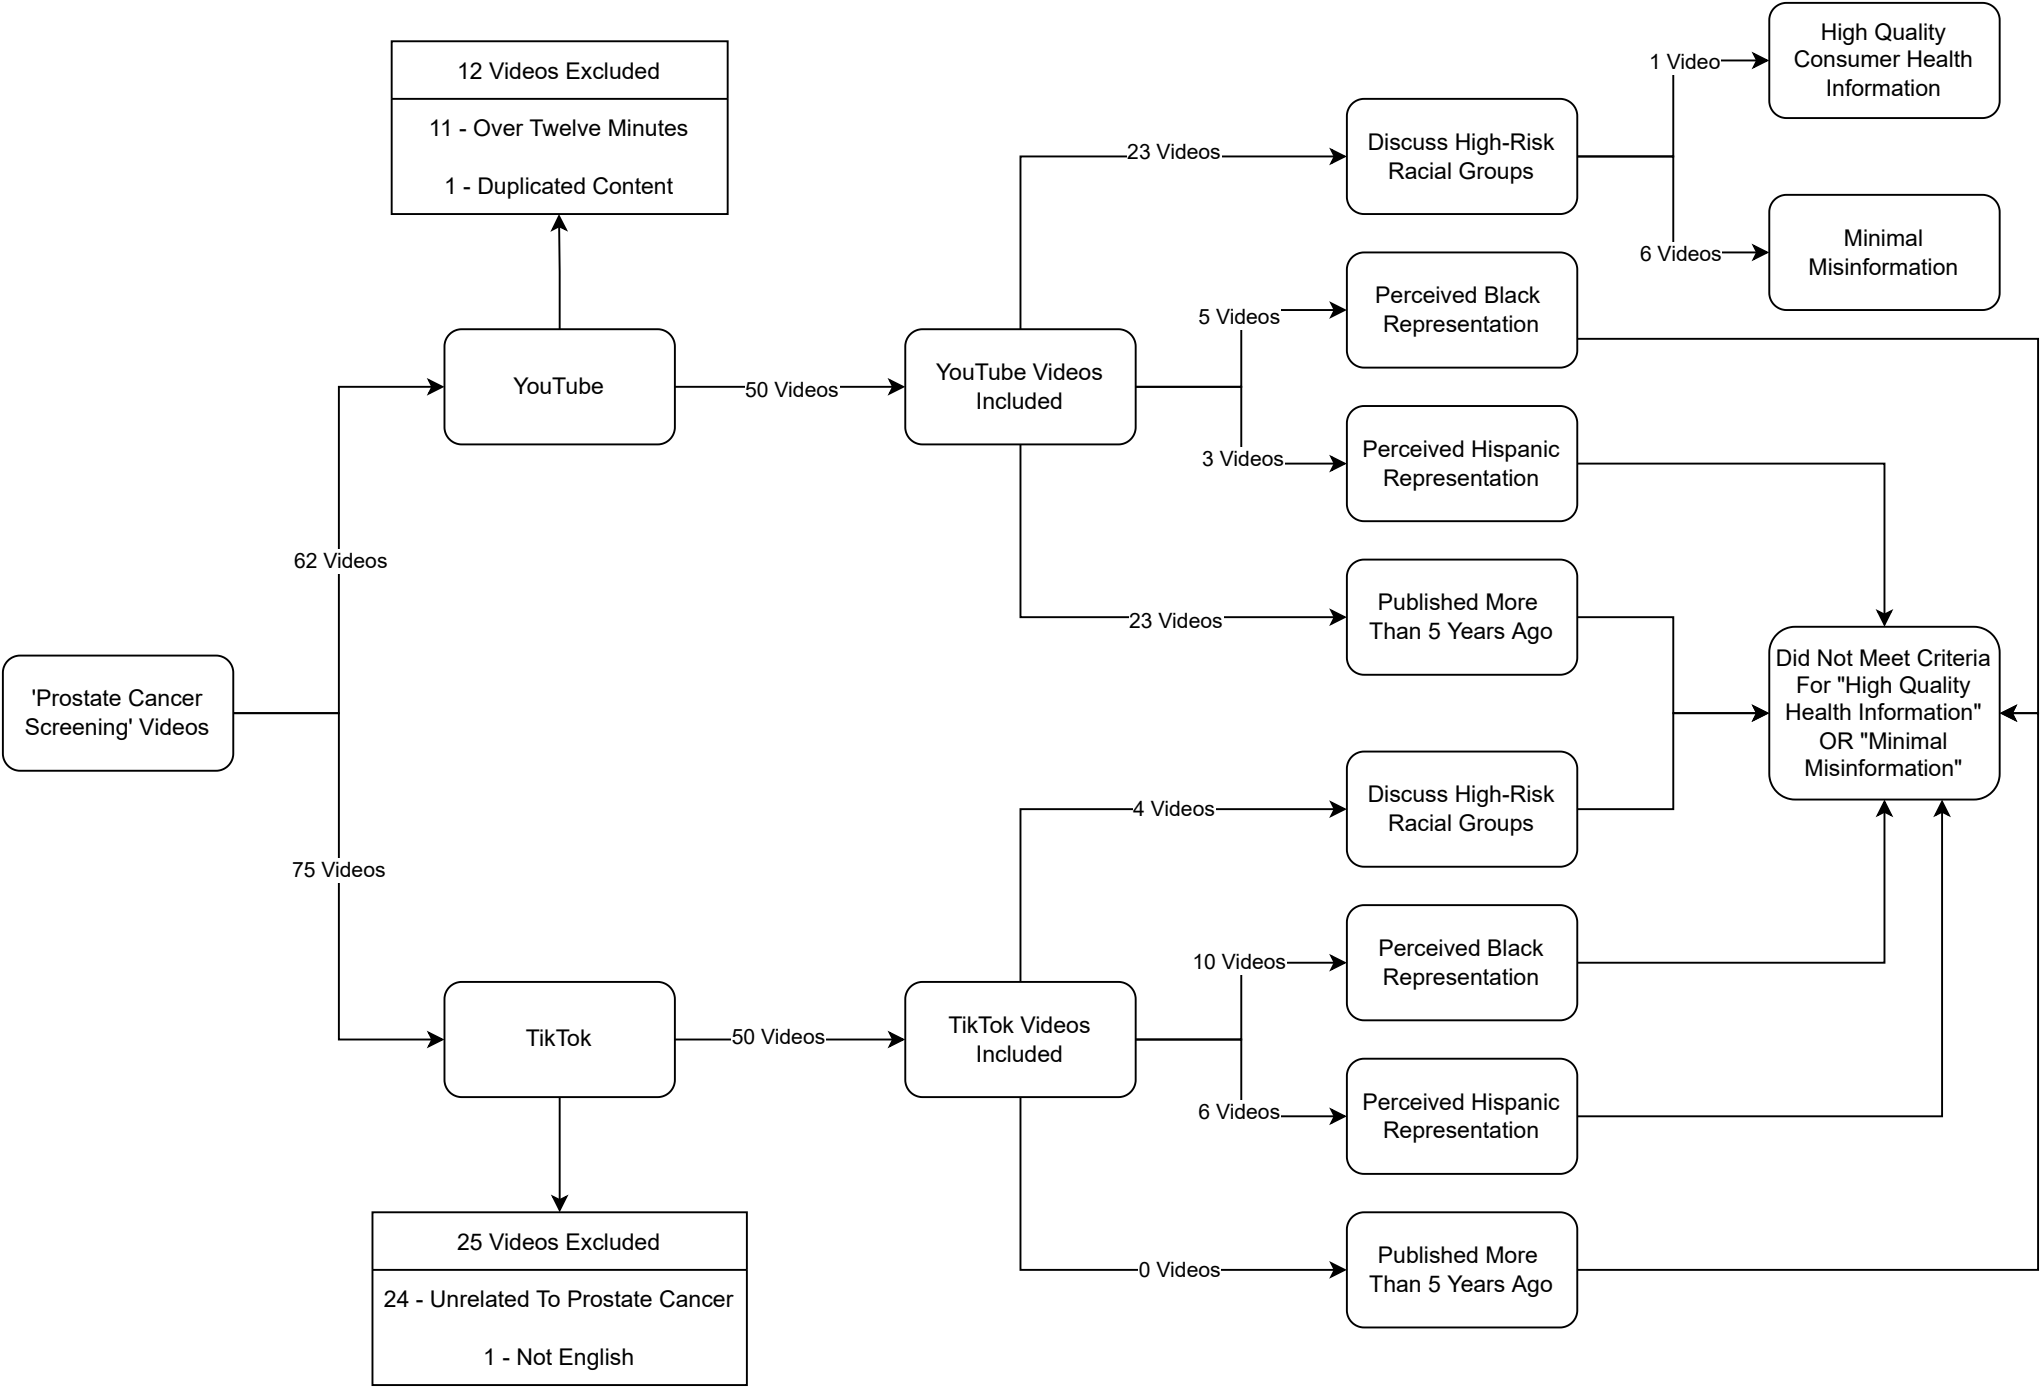

Supplement: BCO2-4-206-s001.pdf [file BCO2-4-206-s001.pdf]
